# Supplementary material
Source: publisher figshare collection journal article supplement (https://tandf.figshare.com/ndownloader/files/22489046)
Supplement: Supplementary file 1 [file 22489046]

Online Supplementary Material: Table 1

*Emotions (means) as a function of emotion conditions*

|  | Emotion Conditions | | | | | | |
| --- | --- | --- | --- | --- | --- | --- | --- |
|  | Amusement | Awe | Challenge | Compassion | Contentment | Gratitude | Hope |
| Amusement | **8.49 (1.01)** | 4.29 (2.81) | 2.39 (2.10) | 1.63 (1.65) | 3.70 (2.46) | 3.35 (2.65) | 2.28 (2.13) |
| Awe | 4.03 (2.82) | **8.68 (0.63)** | 2.25 (2.10) | 2.76 (2.57) | 2.92 (2.56) | 4.60 (3.09) | 3.25 (2.71) |
| Challenge | 2.50 (2.13) | 4.42 (2.95) | **8.67 (0.56)** | 4.36 (2.73) | 3.37 (2.82) | 3.74 (2.95) | 5.65 (2.81) |
| Compassion | 2.90 (2.39) | 3.28 (2.57) | 2.42 (2.29) | **8.22 (1.39)** | 3.83 (2.84) | 3.94 (2.92) | 3.87 (3.11) |
| Contentment | 6.01 (2.27) | 5.54 (2.66) | 3.89 (2.64) | 3.56 (2.77) | **8.44 (0.92**) | 5.86 (2.75) | 4.68 (2.89) |
| Gratitude | 3.73 (2.61) | 5.20 (3.14) | 3.56 (3.02) | 4.92 (3.03) | 5.82 (2.63) | **8.74 (0.58)** | 4.62 (3.2) |
| Hope | 3.83 (2.80) | 5.25 (2.74) | 5.51 (2.43) | 5.04 (2.48) | 5.49 (2.51) | 5.63 (2.56) | **8.26 (1.31)** |
| Interest | 6.65 (2.43) | 6.88 (2.27) | 4.94 (2.96) | 4.31 (3.10) | 4.56 (2.75) | 4.19 (2.88) | 5.06 (3.01) |
| Joy | 7.15 (1.86) | 6.24 (2.56) | 4.39 (2.73) | 3.23 (2.60) | 7.44 (1.67) | 6.83 (2.27) | 5.54 (2.63) |
| Pride | 3.53 (2.73) | 3.89 (3.00) | 5.52 (2.72) | 2.85 (2.60) | 4.32 (2.73) | 3.46 (2.92) | 4.66 (3.02) |
| Relief | 2.39 (2.13) | 3.05 (2.74) | 3.60 (2.99) | 3.25 (2.60) | 5.36 (2.72) | 5.68 (2.72) | 4.72 (3.08) |
| Romantic Love | 1.94 (2.17) | 1.30 (1.28) | 1.11 (0.62) | 2.26 (2.78) | 2.81 (2.96) | 1.34 (1.32) | 1.34 (1.39) |
| Serenity | 4.27 (2.51) | 5.47 (2.82) | 2.24 (1.92) | 2.83 (2.32) | 6.79 (2.04) | 4.52 (3.00) | 3.69 (2.93) |
| *tcontrast*a | 26.17 | 31.91 | 32.46 | 24.14 | 28.85 | 26.81 | 24.79 |

In parentheses are *SD*s. In bold are the targeted emotion for each emotion condition. a Contrast within emotion condition; the targeted emotion was coded as 12; all other reported emotions were coded as -1. b Contrast across emotion conditions; the eliciting emotion condition was coded as 12; all other conditions were coded as -1. All *tcontrast* are significant at *p*< .001.

Online Supplementary Material: Table 1

*Emotions (means) as a function of emotion conditions (continue)*

|  | Emotion Conditions | | | | | | *tcontrastb* |
| --- | --- | --- | --- | --- | --- | --- | --- |
|  | Interest | Joy | Pride | Relief | Romantic Love | Serenity |
| Amusement | 4.91 (2.55) | 4.89 (2.72) | 3.84 (2.69) | 2.72 (2.58) | 4.49 (2.75) | 3.41 (2.49) | 31.44 |
| Awe | 5.13 (3.00) | 4.62 (2.82) | 4.28 (2.75) | 2.82 (2.57) | 4.37 (2.98) | 5.13 (2.71) | 35.84 |
| Challenge | 5.94 (2.65) | 3.42 (4.64) | 5.42 (2.69) | 4.64 (2.86) | 3.63 (2.69) | 2.50 (2.35) | 25.63 |
| Compassion | 3.18 (2.79) | 3.85 (3.39) | 2.90 (2.68) | 3.39 (2.83) | 4.75 (2.97) | 4.04 (2.86) | 23.18 |
| Contentment | 5.33 (2.85) | 7.31 (5.32) | 7.37 (1.93) | 5.32 (2.92) | 6.51 (2.35) | 7.29 (1.75) | 18.02 |
| Gratitude | 4.31 (2.95) | 6.51 (5.96) | 6.00 (2.53) | 5.96 (2.92) | 5.39 (3.03) | 5.00 (3.07) | 17.69 |
| Hope | 5.25 (2.83) | 5.79 (5.59) | 5.63 (2.76) | 5.59 (2.52) | 6.24 (2.43) | 5.35 (2.48) | 14.82 |
| Interest | **8.42 (1.11)** | 5.51 (3.94) | 5.58 (2.82) | 3.94 (2.71) | 6.58 (2.45) | 4.89 (2.88) | 16.82 |
| Joy | 5.81 (2.45) | **8.44 (6.06)** | 7.90 (1.42) | 6.06 (2.71) | 7.71 (1.59) | 7.00 (1.97) | 19.72 |
| Pride | 4.23 (2.64) | 5.45 (4.66) | **8.78 (0.58)** | 4.66 (3.12) | 3.84 (2.58) | 3.00 (2.60) | 31.18 |
| Relief | 2.72 (2.25) | 5.23 (8.46) | 5.52 (2.87) | **8.46 (1.35)** | 3.10 (2.55) | 4.50 (2.89) | 23.08 |
| Romantic Love | 1.68 (1.89) | 2.45 (1.51) | 1.00 (0.00) | 1.51 (1.84) | **8.33 (1.08)** | 2.13 (2.22) | 59.05 |
| Serenity | 3.94 (2.57) | 5.60 (4.44) | 4.75 (2.64) | 4.44 (2.95) | 5.43 (2.72) | **8.72 (1.33)** | 22.70 |
| *tcontrast*a | 24.86 | 22.79 | 28.91 | 20.53 | 21.64 | 23.10 | 31.44 |
